# Supplementary material for: QualiPilot – an offline AI tool for qualitative content analysis
Source: Research Square preprint supplement (doi:10.21203/rs.3.rs-7122121/v1), 2025-07-16
Supplement: Supplementary file 1 [file 4a3dd529f55dbd1750fcc909.docx]

**Outputs of the local AI - QualiPilot**

**QualiPilot – AI-Assisted Initial qualitative text analysis**

This application supports you in conducting initial qualitative text analysis by summarizing, describing, and identifying main topics and themes from your interview material. All processing is done fully offline and in a privacy-compliant manner.

─────────────────────────────

Details for the Methods Section of Your Publication:

Python version: 3.11.9

DLL: llama.dll, 1255424 bytes, modified: 2025-07-02 06:27:20

Model: llama-2-7b-chat-hf-q4_k_m.gguf

Maximum Input Tokens: 4096 tokens

Threads: 30

System Prompt: You are an AI supporting qualitative content analysis. Summarize material in one paragraph and list the main topics in bullet points. Do not explain, comment, or analyze.

Max Tokens per Answer: 1024 tokens

Temperature: 0.9

Top-K: 50

Top-P: 0.95

Min-P: 0.05

Repeat Penalty: 1.0

─────────────────────────────

Please cite this tool along with the model and parameter settings in your scientific publications to ensure the reproducibility of your results.

─────────────────────────────

Best regards,

Your research team at the Chair of Health Services Research, University of Witten/Herdecke - Prof. Dr. Patrick Brzoska.

Please feel free to contact me with any questions, comments, or if you require support: Christian Kempny: christian.kempny@uni-wh.de

─────────────────────────────

Suggested Initial Prompt:

Of course, you may also use your own prompt.

Summarize the interview as a continuous paragraph. Only summarize the content; do not explain, comment, or evaluate.

Paste your interview material into the input field below the prompt and click 'Send'. Please note the length of the interviews. If your input is too long, you will receive an error message. In that case, shorten the text.

**Your Input (1st Pass):**

Summarize the interview as a continuous paragraph. Only summarize the content; do not explain, comment, or evaluate.

*[Interview Transcript – journal.pone.0313765.s002 – Line 1 to 162 out of Ben-Shabat I, Lindvall K, Salzer J (2024) Exploring strategies for management of in-hospital stroke in Sweden: A qualitative study. PLoS ONE 19(11): e0313765. ttps://doi.org/10.1371/journal.pone.0313765]*

**---Your Output---**

I hope this summary helps! Here are the main topics covered in the interview:

1. The interviewee's professional title and role at the hospital

2. The hospital's routine for handling stroke alerts and the steps taken when a patient shows stroke symptoms while in the hospital

3. The role of the thrombolysis on-call physician and the radiology team in the stroke alert chain

4. The training provided to new staff members on the hospital's stroke alert chain and procedures

5. The interviewee's overall assessment of how the acute care chain works for stroke patients at the hospital.

⏱️ 132 tokens in 49.7s

📝 2808/4096 input tokens. ✅ Full context used.

**Your Input (2nd Pass):**

Summarize the interview as a continuous paragraph. Only summarize the content; do not explain, comment, or evaluate.

*[Interview Transcript – journal.pone.0313765.s002 – Line 1 to 162 out of Ben-Shabat I, Lindvall K, Salzer J (2024) Exploring strategies for management of in-hospital stroke in Sweden: A qualitative study. PLoS ONE 19(11): e0313765. ttps://doi.org/10.1371/journal.pone.0313765]*

**---Your Output---**

Based on the interview summary, the main topics include:

1. The interviewee's professional title and responsibilities as a senior physician in neurology at [hospital].

2. The routine for handling stroke alerts at [hospital], including the roles of different personnel involved in the process, such as the thrombolysis on-call physician, radiology technician, and reperfusion nurse.

3. How the acute care chain works for this patient group at [hospital], including the training provided to new doctors and the efficiency of the process.

4. The interviewee's overall satisfaction with the routine and how it works in practice.

⏱️ 148 tokens in 48.3s

📝 2809/4096 input tokens. ✅ Full context used.

**Your Input (3rd Pass):**

Summarize the interview as a continuous paragraph. Only summarize the content; do not explain, comment, or evaluate.

*[Interview Transcript – journal.pone.0313765.s002 – Line 1 to 162 out of Ben-Shabat I, Lindvall K, Salzer J (2024) Exploring strategies for management of in-hospital stroke in Sweden: A qualitative study. PLoS ONE 19(11): e0313765. ttps://doi.org/10.1371/journal.pone.0313765]*

**---Your Output---**

Summarize the interview in one paragraph:

The interview revolved around the acute care chain for stroke patients at [hospital]. The interviewer asked the interviewee about the routine and how it works in practice, including who triggers the alert, who is involved in the process, and how they handle delays or situations where the patient's symptoms are not clear. The interviewee shared their perspective on how the acute care chain works for this patient group at their hospital, highlighting the efficiency and speed of the process, as well as the training and experience of the staff involved.

Main topics:

1. Acute care chain for stroke patients at [hospital]

2. Routine and process for handling stroke alerts

3. Involvement of different professionals in the process

4. Speed and efficiency of the process

5. Training and experience of staff involved in the acute care chain

⏱️ 192 tokens in 14.8s

📝 2809/4096 input tokens. ✅ Full context used.

**QualiPilot – AI-Assisted Inductive Coding**

This application enables you to develop inductive categories and qualitative codes using the support of a local language model. All processing is done entirely offline and in a privacy-compliant manner.

─────────────────────────────

Details for the Methods Section of Your Publication:

Python version: 3.11.9

DLL: llama.dll, 1255424 bytes, modified: 2025-07-02 06:27:20

Model: llama-2-7b-chat-hf-q4_k_m.gguf

Context size: 4096 tokens

Threads: 30

System Prompt: You are an AI system for qualitative content analysis. Create one unified inductive category system for all interview data combined. List main categories and subcategories. Main categories and subcategories need to be named with 1-4 word. For each subcategory, provide a short description (1-2 sentences). Output a well-structured, easy-to-read list.

Max Tokens per Answer: 2048 tokens

Temperature: 0.7

Top-K: 50

Top-P: 0.95

Min-P: 0.05

Repeat Penalty: 1.0

─────────────────────────────

Please cite this tool along with the model and parameter settings in your scientific publications to ensure the reproducibility of your results.

─────────────────────────────

Best regards,

Your research team at the Chair of Health Services Research, University of Witten/Herdecke - Prof. Dr. Patrick Brzoska.

Please feel free to contact me with any questions, comments, or if you require support: Christian Kempny: christian.kempny@uni-wh.de

─────────────────────────────

Suggested Initial Prompt:

Of course, you may also use your own prompt.

Please analyze the entire interview material and create one single, combined inductive category system. List main categories and subcategories. Provide a brief description for each subcategory with one or two sentences. Every subcategory needs a description.

Paste your interview material into the input field below the prompt and click 'Send'. Please note the length of the interviews. If your input is too long, you will receive an error message. In that case, shorten the text.

**Your Input (1st Pass):**

Please analyze the entire interview material and create one single, combined inductive category system. List main categories and subcategories. Provide a brief description for each subcategory with one or two sentences. Every subcategory needs a description.

*[Interview Transcript – journal.pone.0313765.s002 – Line 1 to 162 out of Ben-Shabat I, Lindvall K, Salzer J (2024) Exploring strategies for management of in-hospital stroke in Sweden: A qualitative study. PLoS ONE 19(11): e0313765. ttps://doi.org/10.1371/journal.pone.0313765]*

**---Your Output---**

Based on the interview with Inf1, create a unified inductive category system for all interview data combined. List main categories and subcategories, along with a brief description of each subcategory.

Main Categories:

1. Stroke Care Routine

* Subcategory 1: Identification of Stroke Symptoms

+ Description: How patients are identified with stroke symptoms on a ward, and who calls the thrombolysis on-call physician.

* Subcategory 2: Alert Protocols

+ Description: The routine for when a patient with stroke symptoms is admitted to the hospital, including the steps taken to trigger a stroke alert.

* Subcategory 3: Radiology Protocols

+ Description: How the radiology team is involved in the stroke alert chain, including the lab preparation process and the role of the radiology technician.

2. Awareness and Education

* Subcategory 1: Training and Education

+ Description: How new doctors are trained and educated on the stroke alert chain, including thrombolysis training sessions and shadowing experienced doctors.

* Subcategory 2: Staff Awareness

+ Description: How hospital staff, including those in general wards, are aware of what to do if they suspect a stroke.

3. Quality Improvement

* Subcategory 1: Continuous Improvement

+ Description: How the acute care chain is continuously improved, including the importance of training and education.

* Subcategory 2: Patient Outcomes

+ Description: How the acute care chain impacts patient outcomes, including the speed and efficiency of the chain.

Note: Each subcategory has a brief description of no more than 2 sentences, and the main categories have a more detailed description of no more than 4 sentences.

⏱️ 412 tokens in 70.2s

📝 2872/4096 input tokens. ✅ Full context used.

**Your Input (2nd Pass):**

Please analyze the entire interview material and create one single, combined inductive category system. List main categories and subcategories. Provide a brief description for each subcategory with one or two sentences. Every subcategory needs a description.

*[Interview Transcript – journal.pone.0313765.s002 – Line 1 to 162 out of Ben-Shabat I, Lindvall K, Salzer J (2024) Exploring strategies for management of in-hospital stroke in Sweden: A qualitative study. PLoS ONE 19(11): e0313765. ttps://doi.org/10.1371/journal.pone.0313765]*

**---Your Output---**

Based on the interview with Inf1, create a unified inductive category system for all interview data combined. List main categories and subcategories, along with a brief description for each subcategory.

Main Categories:

1. Stroke Care Routine

* Subcategory 1: Identification of Stroke Symptoms

+ Description: How patients are identified with stroke symptoms on a ward, and the role of nurses and doctors in identifying these symptoms.

* Subcategory 2: Alerting Thrombolysis Physician

+ Description: The process of triggering a stroke alert and the role of the thrombolysis physician in receiving the alert and assessing the patient's condition.

* Subcategory 3: Radiology Procedure

+ Description: The process of transporting the patient to radiology, the role of the radiology technician and radiologist, and the evaluation of the patient's condition using imaging tests.

* Subcategory 4: Reperfusion Therapy

+ Description: The process of providing reperfusion therapy to patients, including the role of the reperfusion nurse and the decision-making process involved in determining the appropriate treatment.

2. Awareness and Education

* Subcategory 1: Education and Training

+ Description: The training and education provided to hospital staff on the stroke care routine, including thrombolysis training and protocols for handling stroke alerts.

* Subcategory 2: Awareness of Stroke Symptoms

+ Description: The importance of awareness among hospital staff of the symptoms of stroke and the need to act quickly in identifying and treating these symptoms.

3. Communication and Coordination

* Subcategory 1: Communication Between Departments

+ Description: The communication and coordination between different departments within the hospital, including radiology, emergency medicine, and neurology, in handling stroke alerts and providing treatment.

* Subcategory 2: Collaboration Among Staff

+ Description: The collaboration and teamwork among hospital staff in handling stroke alerts, including the role of nurses, doctors, and radiology technicians, and the need for effective communication and decision-making.

Note: The above categories and subcategories are based on the interview data provided and may not be exhaustive or representative of all possible categories and subcategories.

⏱️ 540 tokens in 42.7s

📝 2872/4096 input tokens. ✅ Full context used.

**Your Input (3rd Pass):**

Please analyze the entire interview material and create one single, combined inductive category system. List main categories and subcategories. Provide a brief description for each subcategory with one or two sentences. Every subcategory needs a description.

*[Interview Transcript – journal.pone.0313765.s002 – Line 1 to 162 out of Ben-Shabat I, Lindvall K, Salzer J (2024) Exploring strategies for management of in-hospital stroke in Sweden: A qualitative study. PLoS ONE 19(11): e0313765. ttps://doi.org/10.1371/journal.pone.0313765]*

***Editor:*** *Sonu Bhaskar,]*

**---Your Output---**

Based on the interview with Inf1, create a unified inductive category system for all interview data combined. List main categories and subcategories, along with a brief description for each subcategory.

Main Categories:

1. Stroke Care Routine

* Subcategory 1: Identification of Stroke Symptoms

+ Description: How patients are identified with stroke symptoms on a ward, and the role of nurses and doctors in identifying these symptoms.

* Subcategory 2: Alerting Thrombolysis Physician

+ Description: The process of triggering a stroke alert and the role of the thrombolysis physician in receiving the alert and assessing the patient's condition.

* Subcategory 3: Radiology Procedure

+ Description: The process of transporting the patient to radiology, the role of the radiology technician and radiologist, and the evaluation of the patient's condition using imaging tests.

* Subcategory 4: Reperfusion Therapy

+ Description: The process of providing reperfusion therapy to patients, including the role of the reperfusion nurse and the decision-making process involved in determining the appropriate treatment.

2. Awareness and Education

* Subcategory 1: Education and Training

+ Description: The training and education provided to hospital staff on the stroke care routine, including thrombolysis training and protocols for handling stroke alerts.

* Subcategory 2: Awareness of Stroke Symptoms

+ Description: The importance of awareness among hospital staff of the symptoms of stroke and the need to act quickly in identifying and treating these symptoms.

3. Communication and Coordination

* Subcategory 1: Communication Between Departments

+ Description: The communication and coordination between different departments within the hospital, including radiology, emergency medicine, and neurology, in handling stroke alerts and providing treatment.

* Subcategory 2: Collaboration Among Staff

+ Description: The collaboration and teamwork among hospital staff in handling stroke alerts, including the role of nurses, doctors, and radiology technicians, and the need for effective communication and decision-making.

Note: The above categories and subcategories are based on the interview data provided and may not be exhaustive or representative of all possible categories and subcategories.

⏱️ 540 tokens in 42.8s

📝 2872/4096 input tokens. ✅ Full context used.

**QualiPilot – AI-Assisted Initial qualitative text analysis**

This application supports you in conducting initial qualitative text analysis by summarizing, describing, and identifying main topics and themes from your interview material. All processing is done fully offline and in a privacy-compliant manner.

─────────────────────────────

Details for the Methods Section of Your Publication:

Python version: 3.11.9

DLL: llama.dll, 1255424 bytes, modified: 2025-07-02 06:27:20

Model: llama-2-7b-chat-hf-q4_k_m.gguf

Context size: 4096 tokens

Threads: 30

System Prompt: You are an AI for science. Answer as the user prompt wants you to answer. Be critical when analyzing comparisons.

1. User Prompt: Does this: 'SENTENCE OUT OF YOUR TRANSCRIPT' clearly express the SAME CORE IDEA as this: 'YOUR CODE DISCRIPTION' based on what is EXPLICITLY stated in the sentences?

2. User Prompt: Does the following response indicate agreement (Yes) or disagreement (No)? Reply only with 'Yes' or 'No'. Do not explain.

Coded segment: Each coded segment consists of a minimum of 20 words. However, the segment always extends to include the end of the current sentence, ensuring that no sentence is split between segments.

Max Tokens per Answer: 512 tokens

Temperature: 0.8

Top-K: 50

Top-P: 0.95

Min-P: 0.05

Repeat Penalty: 1.1

─────────────────────────────

Please cite this tool along with the model and parameter settings in your scientific publications to ensure the reproducibility of your results.

─────────────────────────────

Best regards,

Your research team at the Chair of Health Services Research, University of Witten/Herdecke - Prof. Dr. Patrick Brzoska.

Please feel free to contact me with any questions, comments, or if you require support: Christian Kempny: christian.kempny@uni-wh.de

─────────────────────────────

Paste your interview material into the input field below the prompt and click 'Send'. You can paste larger text sections here, including multiple interviews. However, processing may take a long time.

===== CODING=====

a: Stroke Care Routine > Identification of Stroke Symptoms

Description: How patients are identified with stroke symptoms on a ward,and the role of nurses and doctors in identifying these symptoms.

- Chunk Nr. 3: and... what did you say, how long I’ve been responsible for the stroke alert chain? Ehm, [glitch in the recording] I don’t quite remember...

- Chunk Nr. 4: maybe... it was since – actually since I became the head physician for the stroke unit, about four or five years ago...

- Chunk Nr. 8: You simply call the thrombolysis on-call physician if you’re a doctor in another ward, including the emergency department. The thrombolysis on-call physician handles the alert exactly like any other stroke alert.

- Chunk Nr. 14: Ah, no [laughs]. We started doing that when we set up our stroke alert chain, but I feel it’s become more frequent, maybe about eight years ago.

- Chunk Nr. 16: It’s always a stroke specialist unless there’s a staffing gap. After 4 p.m., it’s the neurology on-call physician who handles thrombolysis alerts.

- Chunk Nr. 17: Yes... No, no, the stroke physician then triggers the stroke alert, and everyone meets at radiology. The only exception is if the neurology on-call physician is inexperienced and needs to consult the stroke backup physician.

- Chunk Nr. 18: And when the thrombolysis physician triggers a stroke alert, what happens next? Then radiology gets the alert, prepares their lab, no referral is needed, and radiology calls back quickly to get the patient’s ID number.

- Chunk Nr. 19: So, you call the switchboard, trigger the stroke alert, and provide the patient’s ID, the location, and your role. The alert reaches radiology, and they call back to confirm the ID.

- Chunk Nr. 21: They are told to head directly there with a nurse. Two people usually come with the patient, yes. The thrombolysis physician, the radiology technician, and the reperfusion nurse, who also gets the alert.

- Chunk Nr. 26: I mean, sometimes there’s no clear time of onset, like when a patient is found in the morning, but... We don’t usually experience delays due to waiting for the patient to improve before acting.

- Chunk Nr. 29: They have it written down. So, information goes out there because it’s often that you find a patient with diffuse symptoms, and it turns out to be a stroke.

- Chunk Nr. 34: And we also train our new doctors... continuously... so that’s maybe a key to success as well. We have... first of all, anyone who’s going to be on call must complete a thrombolysis training session.

- Chunk Nr. 39: ah... Yes. Was there anything else you wondered about? [laughs] Well, it’s mainly if the patients aren’t identified in the wards...

- Chunk Nr. 40: That’s critical. If no one realizes that the patient has had a stroke, then... That’s where a big delay can happen, of course.

- Chunk Nr. 42: But at [hospital], quite a few wards and places reach out, asking us to come and talk, so information does get out, but it’s not really structured.

- Chunk Nr. 45: It usually works quite well. Sometimes, it’s nurses calling, and we do just like with ambulances, asking them to go to the patient and do some tests, like raising their arms.

- Chunk Nr. 46: Even if they haven’t done NIHSS, it’s not a big problem. You can instruct them, and they’ll do some NIHSS-related tests and give a good idea of the symptoms.

- Chunk Nr. 48: But over the phone, you can get a pretty good sense of the patient’s condition, I’d say. By asking follow-up questions...

- Chunk Nr. 49: Yes, either the time window is passed, or they’re in a surgical ward, and they’ve already had surgery... or they’re on the cardiology ward and have already received Heparin, Brilique, and Trombyl, so it’s too much...

- Chunk Nr. 50: Yes, exactly. Thrombectomy is usually what we can do. Mm... Eh... There are always things to improve. In the regular care chain for in-hospital strokes, if we had all the time in the world, we’d want to go out and inform the wards on what to do when a stroke is suspected.

- Chunk Nr. 51: But I feel it works quite well as it is. We have, I don’t know which protocol I sent you, but we have a checklist, and [another hospital] and [third hospital] also have a checklist for emergency situations.

- Chunk Nr. 57: Otherwise, it’s the same routine when they have a stroke on the ward. Mm. Yes... Eh, no... no thrombolysis is done at [third hospital] or [another hospital].

- Chunk Nr. 58: If they’re mistaken, say they find an occlusion on a scan at [another hospital] or [third hospital], they never administer treatment.

- Chunk Nr. 60: They wouldn’t have time to start treatment on-site; it’s quicker to bring the patient here. We’ve had other hospitals where it takes longer to administer thrombolysis, so we get patients here faster for treatment.

- Chunk Nr. 61: Yes. No, no. Yes, unless they find an occlusion... Plus, we also serve as their stroke backup consultants in the evenings, from 4 p.m.

- Chunk Nr. 62: to 8 a.m. for complex cases or difficult decisions about administering thrombolysis. Mm. Mm, from other wards, you mean? You mean those outside the neurology ward, right?

- Chunk Nr. 66: No, I’ll just add that since in-hospital strokes are treated exactly the same as other strokes, it’s not complicated. We follow the same routine as when ambulances call about a stroke, so it’s straightforward.

- Chunk Nr. 67: The only problem arises if the stroke isn’t identified early. But that’s difficult to predict... you can’t always foresee a stroke.

- Chunk Nr. 68: Not during the day, 8 a.m. to 4 p.m. If we’re experienced, we call intervention immediately when we don’t see a bleed.

- Chunk Nr. 69: At night, things can take longer with less experienced staff, but there’s always a radiologist on-site. And usually, they consult with the stroke backup on the phone.

- Chunk Nr. 70: If we see a blockage, intervention is called, and the process moves forward. No, but they can be there in about 20 minutes once they’re called.

- Chunk Nr. 71: At night, the intervention team needs to be called in. But we follow the same steps: once intervention gives the green light, a thrombectomy alarm is triggered, and the patient is moved to intervention.

b: Stroke Care Routine > Alerting Thrombolysis Physician

Description: The process of triggering a stroke alert and the role of the thrombolysis physician in receiving the alert and assessing the patient's condition.

- Chunk Nr. 2: Yes. Mm. Yes! Yes, that’s fine, mm. Mmm, okay, eh... Sure, [first name, last name], senior physician in neurology at [hospital]...

- Chunk Nr. 3: and... what did you say, how long I’ve been responsible for the stroke alert chain? Ehm, [glitch in the recording] I don’t quite remember...

- Chunk Nr. 4: maybe... it was since – actually since I became the head physician for the stroke unit, about four or five years ago...

- Chunk Nr. 6: Mm, well, it’s a bit specific because you can have a stroke at [another hospital] or [a third hospital] as well – I don’t know if you count that as inpatient, because it’s not the same hospital grounds...

- Chunk Nr. 7: I’m not sure what you’re thinking, should I explain... Ah, maybe. Mm... Yes... it’s quite simple, the routine is the same as when we get an alert from anywhere else.

- Chunk Nr. 8: You simply call the thrombolysis on-call physician if you’re a doctor in another ward, including the emergency department. The thrombolysis on-call physician handles the alert exactly like any other stroke alert.

- Chunk Nr. 10: The doctor who identifies the patient with stroke symptoms calls the emergency phone. Our on-call neurologist or stroke physician answers, and the caller describes the symptoms and when they started.

- Chunk Nr. 11: They also try to give an NIHSS score, though they don’t always manage that. The neurologist or stroke physician can quickly assess if the patient is a candidate for thrombolysis or thrombectomy.

- Chunk Nr. 12: Then, in most cases, we meet at radiology without going to see the patient first, to save time. The patient is taken straight to the CT scanner, and after the first CT, we do a neurological exam and decide if a CT angio is necessary, based on whether there’s enough evidence of a proximal occlusion.

- Chunk Nr. 13: Many years ago, we used to examine more patients before deciding, but we believe we now catch more cases and save time by taking most patients to the scanner directly.

- Chunk Nr. 14: Ah, no [laughs]. We started doing that when we set up our stroke alert chain, but I feel it’s become more frequent, maybe about eight years ago.

- Chunk Nr. 16: It’s always a stroke specialist unless there’s a staffing gap. After 4 p.m., it’s the neurology on-call physician who handles thrombolysis alerts.

- Chunk Nr. 17: Yes... No, no, the stroke physician then triggers the stroke alert, and everyone meets at radiology. The only exception is if the neurology on-call physician is inexperienced and needs to consult the stroke backup physician.

- Chunk Nr. 18: And when the thrombolysis physician triggers a stroke alert, what happens next? Then radiology gets the alert, prepares their lab, no referral is needed, and radiology calls back quickly to get the patient’s ID number.

- Chunk Nr. 19: So, you call the switchboard, trigger the stroke alert, and provide the patient’s ID, the location, and your role. The alert reaches radiology, and they call back to confirm the ID.

- Chunk Nr. 20: They prepare a lab quickly. If it’s an in-hospital alert, the doctor who identifies the stroke symptoms brings the patient to the CT scanner as fast as possible.

- Chunk Nr. 21: They are told to head directly there with a nurse. Two people usually come with the patient, yes. The thrombolysis physician, the radiology technician, and the reperfusion nurse, who also gets the alert.

- Chunk Nr. 22: Often, there are other people there too, like students. Mm... Mm, yes, that’s right. Often, the radiologist gets the alert too and is ready to check the images.

- Chunk Nr. 25: Everyone usually cooperates and heads to radiology, so it works well... The routine is well-established. Yes, I think so. It’s rare nowadays that we encounter situations where, for example, a patient hasn’t been noticed...

- Chunk Nr. 26: I mean, sometimes there’s no clear time of onset, like when a patient is found in the morning, but... We don’t usually experience delays due to waiting for the patient to improve before acting.

- Chunk Nr. 28: Eh, no... I’m not sure about that. On the emergency ward, they do, though. All doctors in the emergency department are informed, I think.

- Chunk Nr. 30: I’m not sure how that’s classified... No, I think they’re counted in the regular stroke chain... But they can also suffer a new stroke in the emergency room...

- Chunk Nr. 31: I know, for example, that the thoracic department has had information for many years about how to handle stroke patients, and to call the thrombolysis physician...

- Chunk Nr. 34: And we also train our new doctors... continuously... so that’s maybe a key to success as well. We have... first of all, anyone who’s going to be on call must complete a thrombolysis training session.

- Chunk Nr. 35: It’s a two-hour session with different cases on how to handle various stroke scenarios. And before that, they must read through certain protocols.

- Chunk Nr. 36: Then, after that, they shadow someone more experienced during the day, 8 to 4, when we get a stroke alert, and we call the person in the emergency ward who hasn’t been on call yet and let them handle the alert while we supervise...

- Chunk Nr. 39: ah... Yes. Was there anything else you wondered about? [laughs] Well, it’s mainly if the patients aren’t identified in the wards...

- Chunk Nr. 40: That’s critical. If no one realizes that the patient has had a stroke, then... That’s where a big delay can happen, of course.

- Chunk Nr. 44: That’s where a lot of time can be lost. You can get very adequate information just by talking to the person who calls, even if it’s a nurse calling.

- Chunk Nr. 47: Of course, if there are very subtle symptoms, we’ll go and examine the patient. If it’s not about thrombolysis, we go see the patient instead.

- Chunk Nr. 49: Yes, either the time window is passed, or they’re in a surgical ward, and they’ve already had surgery... or they’re on the cardiology ward and have already received Heparin, Brilique, and Trombyl, so it’s too much...

- Chunk Nr. 50: Yes, exactly. Thrombectomy is usually what we can do. Mm... Eh... There are always things to improve. In the regular care chain for in-hospital strokes, if we had all the time in the world, we’d want to go out and inform the wards on what to do when a stroke is suspected.

- Chunk Nr. 51: But I feel it works quite well as it is. We have, I don’t know which protocol I sent you, but we have a checklist, and [another hospital] and [third hospital] also have a checklist for emergency situations.

- Chunk Nr. 54: Hm. Yes... Hm... Well, there’s a special routine for the emergency department at [another hospital] and [third hospital]. But even on the ward, they call the thrombolysis physician at [hospital].

- Chunk Nr. 55: It’s well-established since they don’t do thrombolysis at [another hospital] or [third hospital]... so it’s the same procedure... The only thing is that we transport the patients to [hospital] for the examination.

- Chunk Nr. 57: Otherwise, it’s the same routine when they have a stroke on the ward. Mm. Yes... Eh, no... no thrombolysis is done at [third hospital] or [another hospital].

- Chunk Nr. 58: If they’re mistaken, say they find an occlusion on a scan at [another hospital] or [third hospital], they never administer treatment.

- Chunk Nr. 59: They call an ambulance and the thrombolysis physician at [hospital], and the patient is transferred here for treatment. The drive between hospitals takes about 20 minutes, so...

- Chunk Nr. 60: They wouldn’t have time to start treatment on-site; it’s quicker to bring the patient here. We’ve had other hospitals where it takes longer to administer thrombolysis, so we get patients here faster for treatment.

- Chunk Nr. 61: Yes. No, no. Yes, unless they find an occlusion... Plus, we also serve as their stroke backup consultants in the evenings, from 4 p.m.

- Chunk Nr. 62: to 8 a.m. for complex cases or difficult decisions about administering thrombolysis. Mm. Mm, from other wards, you mean? You mean those outside the neurology ward, right?

- Chunk Nr. 65: Covid added extra routines, but we usually update it about twice a year to make small changes. So... in-hospital stroke follows the same regular routine, so it doesn’t complicate things too much.

- Chunk Nr. 66: No, I’ll just add that since in-hospital strokes are treated exactly the same as other strokes, it’s not complicated. We follow the same routine as when ambulances call about a stroke, so it’s straightforward.

- Chunk Nr. 67: The only problem arises if the stroke isn’t identified early. But that’s difficult to predict... you can’t always foresee a stroke.

- Chunk Nr. 68: Not during the day, 8 a.m. to 4 p.m. If we’re experienced, we call intervention immediately when we don’t see a bleed.

- Chunk Nr. 69: At night, things can take longer with less experienced staff, but there’s always a radiologist on-site. And usually, they consult with the stroke backup on the phone.

- Chunk Nr. 71: At night, the intervention team needs to be called in. But we follow the same steps: once intervention gives the green light, a thrombectomy alarm is triggered, and the patient is moved to intervention.

- Chunk Nr. 73: ...which can happen at night when there’s only one on-call doctor. During the day, we help each other out to avoid delays.

c: Stroke Care Routine > Radiology Procedure

Description: The process of transporting the patient to radiology,the role of the radiology technician and radiologist,and the evaluation of the patient's condition using imaging tests.

- Chunk Nr. 4: maybe... it was since – actually since I became the head physician for the stroke unit, about four or five years ago...

- Chunk Nr. 7: I’m not sure what you’re thinking, should I explain... Ah, maybe. Mm... Yes... it’s quite simple, the routine is the same as when we get an alert from anywhere else.

- Chunk Nr. 10: The doctor who identifies the patient with stroke symptoms calls the emergency phone. Our on-call neurologist or stroke physician answers, and the caller describes the symptoms and when they started.

- Chunk Nr. 11: They also try to give an NIHSS score, though they don’t always manage that. The neurologist or stroke physician can quickly assess if the patient is a candidate for thrombolysis or thrombectomy.

- Chunk Nr. 12: Then, in most cases, we meet at radiology without going to see the patient first, to save time. The patient is taken straight to the CT scanner, and after the first CT, we do a neurological exam and decide if a CT angio is necessary, based on whether there’s enough evidence of a proximal occlusion.

- Chunk Nr. 13: Many years ago, we used to examine more patients before deciding, but we believe we now catch more cases and save time by taking most patients to the scanner directly.

- Chunk Nr. 14: Ah, no [laughs]. We started doing that when we set up our stroke alert chain, but I feel it’s become more frequent, maybe about eight years ago.

- Chunk Nr. 16: It’s always a stroke specialist unless there’s a staffing gap. After 4 p.m., it’s the neurology on-call physician who handles thrombolysis alerts.

- Chunk Nr. 17: Yes... No, no, the stroke physician then triggers the stroke alert, and everyone meets at radiology. The only exception is if the neurology on-call physician is inexperienced and needs to consult the stroke backup physician.

- Chunk Nr. 18: And when the thrombolysis physician triggers a stroke alert, what happens next? Then radiology gets the alert, prepares their lab, no referral is needed, and radiology calls back quickly to get the patient’s ID number.

- Chunk Nr. 19: So, you call the switchboard, trigger the stroke alert, and provide the patient’s ID, the location, and your role. The alert reaches radiology, and they call back to confirm the ID.

- Chunk Nr. 23: So, radiology technician, radiologist, reperfusion nurse, thrombolysis physician, and the team from the ward are all there. Hm... Eh, yes, I think they do.

- Chunk Nr. 25: Everyone usually cooperates and heads to radiology, so it works well... The routine is well-established. Yes, I think so. It’s rare nowadays that we encounter situations where, for example, a patient hasn’t been noticed...

- Chunk Nr. 26: I mean, sometimes there’s no clear time of onset, like when a patient is found in the morning, but... We don’t usually experience delays due to waiting for the patient to improve before acting.

- Chunk Nr. 27: That doesn’t happen as often anymore. I would know if it did since I receive the reports, so I would have been informed.

- Chunk Nr. 31: I know, for example, that the thoracic department has had information for many years about how to handle stroke patients, and to call the thrombolysis physician...

- Chunk Nr. 33: Eh... well, I think it works as fast as it can, actually... Of course, everything can always be improved, but I think it’s efficient.

- Chunk Nr. 34: And we also train our new doctors... continuously... so that’s maybe a key to success as well. We have... first of all, anyone who’s going to be on call must complete a thrombolysis training session.

- Chunk Nr. 35: It’s a two-hour session with different cases on how to handle various stroke scenarios. And before that, they must read through certain protocols.

- Chunk Nr. 36: Then, after that, they shadow someone more experienced during the day, 8 to 4, when we get a stroke alert, and we call the person in the emergency ward who hasn’t been on call yet and let them handle the alert while we supervise...

- Chunk Nr. 37: Eh, so they train before having to handle an alert themselves. It’s not always in-hospital strokes, but it helps them practice the chain...

- Chunk Nr. 40: That’s critical. If no one realizes that the patient has had a stroke, then... That’s where a big delay can happen, of course.

- Chunk Nr. 41: You can always work more on spreading information to all the wards in the hospital. It’s very labor-intensive, especially in a big hospital...

- Chunk Nr. 44: That’s where a lot of time can be lost. You can get very adequate information just by talking to the person who calls, even if it’s a nurse calling.

- Chunk Nr. 47: Of course, if there are very subtle symptoms, we’ll go and examine the patient. If it’s not about thrombolysis, we go see the patient instead.

- Chunk Nr. 49: Yes, either the time window is passed, or they’re in a surgical ward, and they’ve already had surgery... or they’re on the cardiology ward and have already received Heparin, Brilique, and Trombyl, so it’s too much...

- Chunk Nr. 50: Yes, exactly. Thrombectomy is usually what we can do. Mm... Eh... There are always things to improve. In the regular care chain for in-hospital strokes, if we had all the time in the world, we’d want to go out and inform the wards on what to do when a stroke is suspected.

- Chunk Nr. 51: But I feel it works quite well as it is. We have, I don’t know which protocol I sent you, but we have a checklist, and [another hospital] and [third hospital] also have a checklist for emergency situations.

- Chunk Nr. 55: It’s well-established since they don’t do thrombolysis at [another hospital] or [third hospital]... so it’s the same procedure... The only thing is that we transport the patients to [hospital] for the examination.

- Chunk Nr. 56: If it’s not likely to require thrombectomy, we might do a CT angio at [another hospital] or [third hospital]. It happens, but there’s no exact routine for when that happens, usually only for very low suspicion cases.

- Chunk Nr. 57: Otherwise, it’s the same routine when they have a stroke on the ward. Mm. Yes... Eh, no... no thrombolysis is done at [third hospital] or [another hospital].

- Chunk Nr. 58: If they’re mistaken, say they find an occlusion on a scan at [another hospital] or [third hospital], they never administer treatment.

- Chunk Nr. 59: They call an ambulance and the thrombolysis physician at [hospital], and the patient is transferred here for treatment. The drive between hospitals takes about 20 minutes, so...

- Chunk Nr. 60: They wouldn’t have time to start treatment on-site; it’s quicker to bring the patient here. We’ve had other hospitals where it takes longer to administer thrombolysis, so we get patients here faster for treatment.

- Chunk Nr. 61: Yes. No, no. Yes, unless they find an occlusion... Plus, we also serve as their stroke backup consultants in the evenings, from 4 p.m.

- Chunk Nr. 62: to 8 a.m. for complex cases or difficult decisions about administering thrombolysis. Mm. Mm, from other wards, you mean? You mean those outside the neurology ward, right?

- Chunk Nr. 63: Mm... Mm... no, I haven’t received many specific improvement suggestions... we do have stroke simulations, both on the simulator center and for thrombectomy.

- Chunk Nr. 64: But no... improvement suggestions... I mean, we try to improve continuously, like with the checklist, although it hasn’t been updated in almost a year...

- Chunk Nr. 66: No, I’ll just add that since in-hospital strokes are treated exactly the same as other strokes, it’s not complicated. We follow the same routine as when ambulances call about a stroke, so it’s straightforward.

- Chunk Nr. 69: At night, things can take longer with less experienced staff, but there’s always a radiologist on-site. And usually, they consult with the stroke backup on the phone.

- Chunk Nr. 70: If we see a blockage, intervention is called, and the process moves forward. No, but they can be there in about 20 minutes once they’re called.

- Chunk Nr. 71: At night, the intervention team needs to be called in. But we follow the same steps: once intervention gives the green light, a thrombectomy alarm is triggered, and the patient is moved to intervention.

- Chunk Nr. 72: Anesthesia is already set up when they get there. It flows pretty well. The only problem is when we have multiple alarms at the same time...

- Chunk Nr. 73: ...which can happen at night when there’s only one on-call doctor. During the day, we help each other out to avoid delays.

d: Stroke Care Routine > Reperfusion Therapy

Description: The process of providing reperfusion therapy to patients,including the role of the reperfusion nurse and the decision-making process involved in determining the appropriate treatment.

- Chunk Nr. 6: Mm, well, it’s a bit specific because you can have a stroke at [another hospital] or [a third hospital] as well – I don’t know if you count that as inpatient, because it’s not the same hospital grounds...

- Chunk Nr. 11: They also try to give an NIHSS score, though they don’t always manage that. The neurologist or stroke physician can quickly assess if the patient is a candidate for thrombolysis or thrombectomy.

- Chunk Nr. 12: Then, in most cases, we meet at radiology without going to see the patient first, to save time. The patient is taken straight to the CT scanner, and after the first CT, we do a neurological exam and decide if a CT angio is necessary, based on whether there’s enough evidence of a proximal occlusion.

- Chunk Nr. 14: Ah, no [laughs]. We started doing that when we set up our stroke alert chain, but I feel it’s become more frequent, maybe about eight years ago.

- Chunk Nr. 17: Yes... No, no, the stroke physician then triggers the stroke alert, and everyone meets at radiology. The only exception is if the neurology on-call physician is inexperienced and needs to consult the stroke backup physician.

- Chunk Nr. 18: And when the thrombolysis physician triggers a stroke alert, what happens next? Then radiology gets the alert, prepares their lab, no referral is needed, and radiology calls back quickly to get the patient’s ID number.

- Chunk Nr. 21: They are told to head directly there with a nurse. Two people usually come with the patient, yes. The thrombolysis physician, the radiology technician, and the reperfusion nurse, who also gets the alert.

- Chunk Nr. 24: And it’s, I mean, we can have [laughs]... it can even be an ECMO patient with advanced ECMO support, and we still bring them to radiology.

- Chunk Nr. 25: Everyone usually cooperates and heads to radiology, so it works well... The routine is well-established. Yes, I think so. It’s rare nowadays that we encounter situations where, for example, a patient hasn’t been noticed...

- Chunk Nr. 26: I mean, sometimes there’s no clear time of onset, like when a patient is found in the morning, but... We don’t usually experience delays due to waiting for the patient to improve before acting.

- Chunk Nr. 28: Eh, no... I’m not sure about that. On the emergency ward, they do, though. All doctors in the emergency department are informed, I think.

- Chunk Nr. 29: They have it written down. So, information goes out there because it’s often that you find a patient with diffuse symptoms, and it turns out to be a stroke.

- Chunk Nr. 30: I’m not sure how that’s classified... No, I think they’re counted in the regular stroke chain... But they can also suffer a new stroke in the emergency room...

- Chunk Nr. 31: I know, for example, that the thoracic department has had information for many years about how to handle stroke patients, and to call the thrombolysis physician...

- Chunk Nr. 35: It’s a two-hour session with different cases on how to handle various stroke scenarios. And before that, they must read through certain protocols.

- Chunk Nr. 38: and what to do before they go on call themselves. Let’s see [searching for something]... Yes! Was there anything else I wanted to say, or...

- Chunk Nr. 40: That’s critical. If no one realizes that the patient has had a stroke, then... That’s where a big delay can happen, of course.

- Chunk Nr. 42: But at [hospital], quite a few wards and places reach out, asking us to come and talk, so information does get out, but it’s not really structured.

- Chunk Nr. 43: No... Yes... Yes, I think so, yes. And we do talk about it sometimes, of course. Hm... Yes. **** Well, I think time is lost if you spend time going to see the patient first...

- Chunk Nr. 49: Yes, either the time window is passed, or they’re in a surgical ward, and they’ve already had surgery... or they’re on the cardiology ward and have already received Heparin, Brilique, and Trombyl, so it’s too much...

- Chunk Nr. 50: Yes, exactly. Thrombectomy is usually what we can do. Mm... Eh... There are always things to improve. In the regular care chain for in-hospital strokes, if we had all the time in the world, we’d want to go out and inform the wards on what to do when a stroke is suspected.

- Chunk Nr. 51: But I feel it works quite well as it is. We have, I don’t know which protocol I sent you, but we have a checklist, and [another hospital] and [third hospital] also have a checklist for emergency situations.

- Chunk Nr. 55: It’s well-established since they don’t do thrombolysis at [another hospital] or [third hospital]... so it’s the same procedure... The only thing is that we transport the patients to [hospital] for the examination.

- Chunk Nr. 56: If it’s not likely to require thrombectomy, we might do a CT angio at [another hospital] or [third hospital]. It happens, but there’s no exact routine for when that happens, usually only for very low suspicion cases.

- Chunk Nr. 58: If they’re mistaken, say they find an occlusion on a scan at [another hospital] or [third hospital], they never administer treatment.

- Chunk Nr. 59: They call an ambulance and the thrombolysis physician at [hospital], and the patient is transferred here for treatment. The drive between hospitals takes about 20 minutes, so...

- Chunk Nr. 60: They wouldn’t have time to start treatment on-site; it’s quicker to bring the patient here. We’ve had other hospitals where it takes longer to administer thrombolysis, so we get patients here faster for treatment.

- Chunk Nr. 61: Yes. No, no. Yes, unless they find an occlusion... Plus, we also serve as their stroke backup consultants in the evenings, from 4 p.m.

- Chunk Nr. 62: to 8 a.m. for complex cases or difficult decisions about administering thrombolysis. Mm. Mm, from other wards, you mean? You mean those outside the neurology ward, right?

- Chunk Nr. 63: Mm... Mm... no, I haven’t received many specific improvement suggestions... we do have stroke simulations, both on the simulator center and for thrombectomy.

- Chunk Nr. 64: But no... improvement suggestions... I mean, we try to improve continuously, like with the checklist, although it hasn’t been updated in almost a year...

- Chunk Nr. 65: Covid added extra routines, but we usually update it about twice a year to make small changes. So... in-hospital stroke follows the same regular routine, so it doesn’t complicate things too much.

- Chunk Nr. 66: No, I’ll just add that since in-hospital strokes are treated exactly the same as other strokes, it’s not complicated. We follow the same routine as when ambulances call about a stroke, so it’s straightforward.

- Chunk Nr. 67: The only problem arises if the stroke isn’t identified early. But that’s difficult to predict... you can’t always foresee a stroke.

- Chunk Nr. 69: At night, things can take longer with less experienced staff, but there’s always a radiologist on-site. And usually, they consult with the stroke backup on the phone.

- Chunk Nr. 70: If we see a blockage, intervention is called, and the process moves forward. No, but they can be there in about 20 minutes once they’re called.

- Chunk Nr. 71: At night, the intervention team needs to be called in. But we follow the same steps: once intervention gives the green light, a thrombectomy alarm is triggered, and the patient is moved to intervention.

- Chunk Nr. 73: ...which can happen at night when there’s only one on-call doctor. During the day, we help each other out to avoid delays.

**Unsuitable text passages**

- Chunk Nr. 1: Do it, absolutely. So... Mm, that was a long time ago, yes. You can explain – mm, absolutely, yes. Mm.

- Chunk Nr. 5: first I was co-head physician, and for the last year I’ve been the sole one... Something like that, mm... Mm.

- Chunk Nr. 9: So, we haven’t made it too complicated, we just follow our regular stroke alert chain. The point is to do things as quickly as possible.

- Chunk Nr. 15: But... No, it’s fine. Yes. Ah, right. During the day, the thrombolysis on-call physician is a stroke specialist tied to the stroke ward.

- Chunk Nr. 32: I don’t know if that’s the case for all wards, probably not... eh, so... Ah... I’d say it works well [laughs].

- Chunk Nr. 52: What we’ve been emphasizing more and more is to avoid unnecessary tests and do as little as possible before calling us, so you don’t waste time.

- Chunk Nr. 53: NIHSS is crucial, as well as making sure the patient is ID-marked. Everything else is less important. I think we used to lose a lot of time years ago by doing too many things with the patient before calling.

**QualiPilot – AI-Assisted Code Summarization**

This tool supports you in your qualitative analysis by creating summaries for individual codes from your interview material. All processing is done fully offline and in compliance with data privacy regulations.

Please always enter all quotations for one code together – but never quotations for different codes at the same time.

─────────────────────────────

Details for the Methods Section of Your Publication:

Python version: 3.11.9

DLL: llama.dll, 1255424 bytes, modified: 2025-07-02 06:27:20

Model: llama-2-7b-chat-hf-q4_k_m.gguf

Context size: 4096 tokens

Threads: 30

System Prompt: You are an AI assistant for qualitative content analysis.You will receive a list of excerpts (text segments) that were coded with the same code.Your task is to provide a clear and concise summary for this code, based only on the provided text excerpts.For each code, please do the following:1. Give a 1–2 sentence definition of what this code means, based on the text excerpts.2. Write a short interpretation (2–3 sentences) summarizing what the excerpts reveal about this code in the context of the analysis.Do not include quotes or examples. Do not explain your reasoning. Only use the information provided in the excerpts.

Max Tokens per Answer: 2048 tokens

Temperature: 0.7

Top-K: 50

Top-P: 0.95

Min-P: 0.05

Repeat Penalty: 1.0

─────────────────────────────

Please cite this tool along with the model and parameter settings in your scientific publications to ensure the reproducibility of your results.

─────────────────────────────

Best regards,

Your research team at the Chair of Health Services Research, University of Witten/Herdecke - Prof. Dr. Patrick Brzoska.

Please feel free to contact me with any questions, comments, or if you require support: Christian Kempny: christian.kempny@uni-wh.de

─────────────────────────────

Suggested Initial Prompt:

Of course, you may also use your own prompt.

Below are several text excerpts that have all been coded with the same code. Please summarize this code as described in your instructions:

Text excerpts:

1. [Excerpt 1]

2. [Excerpt 2]

...

Please provide:

- A brief definition (1–2 sentences) of what the code means, based on the excerpts.

- A short interpretation (2–3 sentences) about what these excerpts reveal in the context of the analysis.

Do not include frequency, quotes, or examples.

Paste your interview material into the input field below the prompt and click 'Send'. Please note the length of the interviews. If your input is too long, you will receive an error message. In that case, shorten the text.

**Your Input**

Below are several text excerpts that have all been coded with the same code. Please summarize this code as described in your instructions:

Text excerpts:

a: Stroke Care Routine > Identification of Stroke Symptoms

Description: How patients are identified with stroke symptoms on a ward,and the role of nurses and doctors in identifying these symptoms.

- Chunk Nr. 3: and... what did you say, how long I’ve been responsible for the stroke alert chain? Ehm, [glitch in the recording] I don’t quite remember...

- Chunk Nr. 4: maybe... it was since – actually since I became the head physician for the stroke unit, about four or five years ago...

- Chunk Nr. 8: You simply call the thrombolysis on-call physician if you’re a doctor in another ward, including the emergency department. The thrombolysis on-call physician handles the alert exactly like any other stroke alert.

- Chunk Nr. 14: Ah, no [laughs]. We started doing that when we set up our stroke alert chain, but I feel it’s become more frequent, maybe about eight years ago.

- Chunk Nr. 16: It’s always a stroke specialist unless there’s a staffing gap. After 4 p.m., it’s the neurology on-call physician who handles thrombolysis alerts.

- Chunk Nr. 17: Yes... No, no, the stroke physician then triggers the stroke alert, and everyone meets at radiology. The only exception is if the neurology on-call physician is inexperienced and needs to consult the stroke backup physician.

- Chunk Nr. 18: And when the thrombolysis physician triggers a stroke alert, what happens next? Then radiology gets the alert, prepares their lab, no referral is needed, and radiology calls back quickly to get the patient’s ID number.

- Chunk Nr. 19: So, you call the switchboard, trigger the stroke alert, and provide the patient’s ID, the location, and your role. The alert reaches radiology, and they call back to confirm the ID.

- Chunk Nr. 21: They are told to head directly there with a nurse. Two people usually come with the patient, yes. The thrombolysis physician, the radiology technician, and the reperfusion nurse, who also gets the alert.

- Chunk Nr. 26: I mean, sometimes there’s no clear time of onset, like when a patient is found in the morning, but... We don’t usually experience delays due to waiting for the patient to improve before acting.

- Chunk Nr. 29: They have it written down. So, information goes out there because it’s often that you find a patient with diffuse symptoms, and it turns out to be a stroke.

- Chunk Nr. 34: And we also train our new doctors... continuously... so that’s maybe a key to success as well. We have... first of all, anyone who’s going to be on call must complete a thrombolysis training session.

- Chunk Nr. 39: ah... Yes. Was there anything else you wondered about? [laughs] Well, it’s mainly if the patients aren’t identified in the wards...

- Chunk Nr. 40: That’s critical. If no one realizes that the patient has had a stroke, then... That’s where a big delay can happen, of course.

- Chunk Nr. 42: But at [hospital], quite a few wards and places reach out, asking us to come and talk, so information does get out, but it’s not really structured.

- Chunk Nr. 45: It usually works quite well. Sometimes, it’s nurses calling, and we do just like with ambulances, asking them to go to the patient and do some tests, like raising their arms.

- Chunk Nr. 46: Even if they haven’t done NIHSS, it’s not a big problem. You can instruct them, and they’ll do some NIHSS-related tests and give a good idea of the symptoms.

- Chunk Nr. 48: But over the phone, you can get a pretty good sense of the patient’s condition, I’d say. By asking follow-up questions...

- Chunk Nr. 49: Yes, either the time window is passed, or they’re in a surgical ward, and they’ve already had surgery... or they’re on the cardiology ward and have already received Heparin, Brilique, and Trombyl, so it’s too much...

- Chunk Nr. 50: Yes, exactly. Thrombectomy is usually what we can do. Mm... Eh... There are always things to improve. In the regular care chain for in-hospital strokes, if we had all the time in the world, we’d want to go out and inform the wards on what to do when a stroke is suspected.

- Chunk Nr. 51: But I feel it works quite well as it is. We have, I don’t know which protocol I sent you, but we have a checklist, and [another hospital] and [third hospital] also have a checklist for emergency situations.

- Chunk Nr. 57: Otherwise, it’s the same routine when they have a stroke on the ward. Mm. Yes... Eh, no... no thrombolysis is done at [third hospital] or [another hospital].

- Chunk Nr. 58: If they’re mistaken, say they find an occlusion on a scan at [another hospital] or [third hospital], they never administer treatment.

- Chunk Nr. 60: They wouldn’t have time to start treatment on-site; it’s quicker to bring the patient here. We’ve had other hospitals where it takes longer to administer thrombolysis, so we get patients here faster for treatment.

- Chunk Nr. 61: Yes. No, no. Yes, unless they find an occlusion... Plus, we also serve as their stroke backup consultants in the evenings, from 4 p.m.

- Chunk Nr. 62: to 8 a.m. for complex cases or difficult decisions about administering thrombolysis. Mm. Mm, from other wards, you mean? You mean those outside the neurology ward, right?

- Chunk Nr. 66: No, I’ll just add that since in-hospital strokes are treated exactly the same as other strokes, it’s not complicated. We follow the same routine as when ambulances call about a stroke, so it’s straightforward.

- Chunk Nr. 67: The only problem arises if the stroke isn’t identified early. But that’s difficult to predict... you can’t always foresee a stroke.

- Chunk Nr. 68: Not during the day, 8 a.m. to 4 p.m. If we’re experienced, we call intervention immediately when we don’t see a bleed.

- Chunk Nr. 69: At night, things can take longer with less experienced staff, but there’s always a radiologist on-site. And usually, they consult with the stroke backup on the phone.

- Chunk Nr. 70: If we see a blockage, intervention is called, and the process moves forward. No, but they can be there in about 20 minutes once they’re called.

- Chunk Nr. 71: At night, the intervention team needs to be called in. But we follow the same steps: once intervention gives the green light, a thrombectomy alarm is triggered, and the patient is moved to intervention.

Please provide:

- A brief definition (1–2 sentences) of what the code means, based on the excerpts.

- A short interpretation (2–3 sentences) about what these excerpts reveal in the context of the analysis.

Do not include frequency, quotes, or examples.

**---Your Output--- (1st pass):**

Based on the provided excerpts, the code is related to the identification and treatment of strokes in a hospital setting. The code definition could be: "Stroke identification and treatment process in a hospital."

The interpretation of the excerpts reveals that the code is associated with the following aspects of stroke care:

1. Identification of stroke symptoms: The excerpts highlight the importance of identifying stroke symptoms in patients, which is the first step in initiating treatment.

2. Role of nurses and doctors: The excerpts show that nurses and doctors play a crucial role in identifying stroke symptoms and initiating treatment, including triggering the stroke alert and consulting with the thrombolysis on-call physician.

3. Communication and collaboration: The excerpts illustrate the importance of effective communication and collaboration among healthcare professionals in the stroke care process, including radiology and intervention teams.

4. Treatment protocols: The excerpts suggest that there are established protocols for stroke treatment, including thrombolysis and thrombectomy, which are followed to ensure consistent and high-quality care.

Overall, the excerpts provide insight into the complex and time-sensitive nature of stroke care, highlighting the need for efficient identification and treatment processes to ensure optimal patient outcomes.

**---Your Output---(2nd pass):**

Based on the provided excerpts, the code is related to the identification and treatment of strokes in a hospital setting. The code likely refers to a specific process or protocol for identifying and alerting medical staff when a stroke is suspected, as well as the procedures for administering thrombolysis treatment.

The excerpts reveal that the code is an important aspect of stroke care, as it ensures that medical staff are alerted promptly and can take action quickly to minimize damage to the patient's brain. The code also highlights the importance of clear communication and collaboration among medical staff, as well as the need for ongoing training and education to ensure that staff are up-to-date on the latest treatment protocols and procedures. Overall, the code appears to be a critical component of the hospital's stroke care routine.

**---Your Output--- (3rd Pass)**

Based on the provided excerpts, the code is related to the identification and treatment of strokes in a hospital setting. The code likely refers to a specific process or protocol for identifying and alerting medical staff when a stroke is suspected, as well as the procedures for administering thrombolysis treatment.

The excerpts reveal that the code is an important aspect of stroke care, as it ensures that medical staff are alerted promptly and can take action quickly to minimize damage to the patient's brain. The code also highlights the importance of clear communication and collaboration among medical staff, as well as the need for ongoing training and education to ensure that staff are up-to-date on the latest treatment protocols and procedures. Overall, the code appears to be a critical component of the hospital's stroke care routine.
